# Supplementary material for: The D-score: a metric for interpreting the early development of infants and toddlers across global settings
Source: PubMed Central journal article supplement (PMC6882553; doi:10.1136/bmjgh-2019-001724), 2019-11-19
Supplement: bmjgh-2019-001724supp001.pdf [file bmjgh-2019-001724supp001.pdf]

## Appendix: The D-score: a metric for interpreting the early development of infants and toddlers across global settings

**Table A1: Name, abbreviation and citations for instruments during early childhood and at school-age**

| Country/cohort                                                     | Early Childhood Instruments                                                                                                         | Abbreviation            |
|--------------------------------------------------------------------|-------------------------------------------------------------------------------------------------------------------------------------|-------------------------|
| Colombia 2                                                         | Ages & Stages Questionnaires, 3 <sup>rd</sup> edition <sup>1</sup>                                                                  | ASQ-3                   |
| Brazil 2, Chile 2, Colombia 2                                      | Battelle Developmental Inventory and Screener, 2 <sup>nd</sup> edition <sup>2</sup>                                                 | BDI-2<br>BDI-2 Screener |
| Bangladesh, Chile 1, China, Colombia 1 & 2, Ethiopia, South Africa | Bayley Scales for Infant and Toddler Development, 1 <sup>st</sup> , 2 <sup>nd</sup> , and 3 <sup>rd</sup> editions <sup>3,4,5</sup> | Bayley-I, II, and III   |
| Brazil 1, Colombia 2                                               | Denver Developmental Screening Test, 2 <sup>nd</sup> edition <sup>6,7</sup>                                                         | Denver-II               |
| Ecuador                                                            | Barrera Moncada <sup>8</sup>                                                                                                        | Barrera                 |
| The Netherlands 1 & 2                                              | Van Wiechenschema <sup>9</sup> (Dutch Developmental Instrument)                                                                     | DDI                     |
| Jamaica 1 & 2, South Africa                                        | Griffiths Mental Development Scales <sup>10</sup>                                                                                   | Griffiths               |
| Madagascar                                                         | Stanford Binet Intelligence Scales version, 5 <sup>th</sup> edition <sup>11</sup>                                                   | SB-5                    |
| Chile 2                                                            | Test de Desarrollo Psicomotor <sup>12</sup>                                                                                         | Tepsi                   |
| South Africa                                                       | Vineland Social Maturity Scale <sup>13</sup>                                                                                        | Vineland                |
| Country/cohort                                                     | School-age Tests                                                                                                                    | Abbreviation            |
| South Africa                                                       | Denver Developmental Screening Test, 2 <sup>nd</sup> edition <sup>6,7</sup>                                                         | Denver-II               |
| Jamaica 2 and South Africa                                         | Raven's Progressive Matrices <sup>14</sup> and Raven's Coloured Progressive Matrices <sup>15</sup>                                  | Raven's                 |
| Ethiopia, Jamaica 1, Madagascar                                    | Peabody Picture Vocabulary Test (PPVT-III <sup>16</sup> and PPVT-4 <sup>17</sup> )                                                  | PPVT                    |
| Chile 2, Colombia 1 & 2, Ecuador                                   | Test de Vocabulario en Imagenes Peabody <sup>18</sup> (Spanish version of the PPVT)                                                 | TVIP                    |
| Jamaica 2 and Madagascar                                           | Stanford Binet Intelligence Scales, 4 <sup>th</sup> edition <sup>19</sup> and 5 <sup>th</sup> edition <sup>11</sup>                 | SB-4<br>SB-5            |
| Brazil 1, Jamaica 2                                                | Wechsler Adult Intelligence Scale <sup>20</sup>                                                                                     | WAIS                    |
| Colombia 2                                                         | Wechsler Intelligence Scale for Children-Revised <sup>21</sup>                                                                      | WISC-V                  |
| Bangladesh, Chile 1, Jamaica 1                                     | Wechsler Preschool & Primary Scale of Intelligence, 3 <sup>rd</sup> and 4 <sup>th</sup> editions <sup>22,23</sup>                   | WPPSI                   |
| Netherlands 1                                                      | Utrechtse Korte Kleuter Intelligentietest <sup>24</sup>                                                                             | UKKI                    |

### Citations for Instruments

- 1 Squires J, Bricker D, Twombly E, Nickel R, Clifford J, Murphy K, et al. Ages & Stages English Questionnaires, Third Edition (ASQ-3): A Parent-Completed, Child-Monitoring System. Baltimore, MD: Paul H. Brookes Publishing Co; 2009.
- 2 Newborg J. Battelle Developmental Inventory-2nd Edition. Rolling Meadows, IL: Riverside

- Publishing, 2005.
- 3 Bayley N. Bayley Scales of Infant Development. New York: Psychological Corp, 1969.
  - 4 Bayley, N. The Bayley Scales of Infant Development-II. San Antonio, TX: Psychological Corporation, 1993.
  - 5 Bayley N. Bayley Scales of Infant and Toddler Development—Third Edition: Technical manual. San Antonio, TX: Harcourt Assessment, 2006.
  - 6 Frankenburg WK, Dodds J, Archer P, Shapiro H, Bresnick B. The Denver II: a major revision and restandardization of the Denver Developmental Screening Test. *Pediatrics* 1992; **89**: 91–7.
  - 7 Frankenburg WK, Dodds J, Archer P, *et al.* The DENVER II Technical Manual. Denver, CO: Denver Developmental Materials, 1990.
  - 8 Barrera Moncada, O. 1981. Crecimiento y desarrollo psicológico del niño venezolano. Ediciones psicopediátricas. Caracas.
  - 9 Schlesinger-Was EA. Ontwikkelingsonderzoek van zuigelingen en kleuters op het consultatiebureau. 1981.
  - 10 Griffiths R. The Abilities of Babies: A Study in Mental Measurement. University of London Press, 1967.
  - 11 Roid GH. Stanford–Binet Intelligence Scales, Fifth Edition. WPS Psychological Tests, 2003.
  - 12 Haeussler IM, Marchant T. Tepsi: test de desarrollo psicomotor 2-5 años. Eds. Universidad Católica de Chile, 1999.
  - 13 Doll EA. The measurement of social competence: A manual for the Vineland Social Maturity Scale. 1953.
  - 14 Raven JC, Court JH. Raven’s progressive matrices and vocabulary scales. Oxford psychologists Press, 1998.
  - 15 Raven JC. Coloured Progressive Matrices: Sets A, Ab, B. Oxford Psychologists Press, 2003.
  - 16 Lloyd M. Dunn, Leota M. Dunn. "Peabody Picture Vocabulary Test-Third Edition (PPVT-III)". Pearson Education.
  - 17 Lloyd M. Dunn, Douglas M. Dunn. "Peabody Picture Vocabulary Test, Fourth Edition (PPVT™-4)". Pearson Education.
  - 18 TVIP Dunn LM, Lugo DE, Padilla ER, Dunn LM. Test de Vocabulario en Imagenes Peabody (TVIP), Pearson Clinical, 1986.
  - 19 SB-4 Hagen E, Stattler J, Stanford–Binet Intelligence Scales, Fourth Edition·Thorndike, 1986.
  - 20 Wechsler D. Wechsler Adult Intelligence Scale®-Fourth Edition. Pearson Education, 2008.
  - 21 Wechsler D. Wechsler Intelligence Scale for Children®-Fifth Edition. Pearson Education, 2014.
  - 22 Wechsler D. Wechsler Preschool and Primary Scale of Intelligence™ - Third Edition. Harcourt Assessment, Inc., San Antonio, TX, 2002.

- 23 Wechsler D. Wechsler Preschool and Primary Scale of Intelligence™ - Fourth Edition. Pearson Education, 2012.
- 24 Baarda, D.B. 1978. UKKI: Utrechtse Korte Kleuter Intelligentietest. Lisse: Swets en Zeitlinger.

**Table A2: Comparison of the average number of items administered to children and the average number of items included in the final Rasch model by study and overall.**

| Country/cohort | Number of items administered | Number of items in final model | Difference | Ratio |
|----------------|------------------------------|--------------------------------|------------|-------|
| Bangladesh     | 63.2                         | 14.2                           | 49         | 22%   |
| Brazil 1       | 19.5                         | 17                             | 2.5        | 87%   |
| Chile 1        | 42.1                         | 30.4                           | 11.7       | 72%   |
| Chile 2        | 61.9                         | 33                             | 28.9       | 53%   |
| China          | 42.8                         | 28                             | 14.8       | 65%   |
| Colombia 1     | 91.5                         | 46.5                           | 45         | 51%   |
| Columbia 2     | 123.9                        | 59.5                           | 64.4       | 48%   |
| Ecuador        | 6.1                          | 3.5                            | 2.6        | 57%   |
| Ethiopia       | 79.5                         | 38.6                           | 40.9       | 49%   |
| Jamaica 1      | 86.6                         | 42.5                           | 44.1       | 49%   |
| Jamaica 2      | 100.8                        | 38.5                           | 62.3       | 38%   |
| Madagascar     | 29.5                         | 7.5                            | 22         | 25%   |
| Netherlands 1  | 11                           | 8.6                            | 2.4        | 78%   |
| Netherlands 2  | 16.8                         | 14.2                           | 2.6        | 85%   |
| South Africa   | 53.6                         | 23                             | 30.6       | 43%   |
| Average        | 55.3                         | 27                             | 28.3       | 55%   |
| Min            | 6.1                          | 3.5                            | 2.4        | 22%   |
| Max            | 123.9                        | 59.5                           | 64.4       | 87%   |

Correlations of the early round scores (Time 1) with follow-up rounds (Time 2) are shown in Table A3a for the DAZ and Table A3b for the original instruments (e.g., Bayley-III, Denver-II). Because time between Time 1 and Time 2 varied considerably for different cohorts, Tables A3a and A3b were split into prediction to middle childhood (>4 to 9 years) and adolescence (>9 to 18 years). When multiple original domain measures were available, we included the cognitive measure (e.g., over language or motor) or the Bayley-III measure (e.g., over the Denver-II in Colombia 2).

**Table A3a: DAZ** in children under 48 months correlated with IQ in Middle Childhood (>4 to 9 years) and Adolescence (>9 to 18 years)

| DAZ        | Time 1        | Time 2: Middle Childhood          |      |                 |                     | Time 2: Adolescence |                                   |      |                 |              |
|------------|---------------|-----------------------------------|------|-----------------|---------------------|---------------------|-----------------------------------|------|-----------------|--------------|
|            | Ages (months) | Ages (years; months) <sup>d</sup> | N    | IQ <sup>a</sup> | Ravens <sup>c</sup> | PPVT                | Ages (years; months) <sup>d</sup> | N    | IQ <sup>b</sup> | PPVT         |
| Bangladesh | 18            | 5;3-5;8                           | 1599 | <b>0·376</b>    |                     |                     |                                   |      |                 |              |
| Brazil 1   | 5-11          |                                   |      |                 |                     |                     | 18;6                              | 1151 | <b>0·172</b>    |              |
|            | 11-19         |                                   |      |                 |                     |                     | 18;6                              | 1117 | <b>0·187</b>    |              |
| Chile 1    | 6             | 5;6-5;8                           | 71   | <b>0·381</b>    |                     |                     |                                   |      |                 |              |
|            | 12            | 5;6-5;8                           | 834  | <b>0·194</b>    |                     |                     |                                   |      |                 |              |
|            | 18            | 5;6-5;8                           | 196  | 0·167           |                     |                     |                                   |      |                 |              |
| Chile 2    | 24-35         | 4;1-5;2                           | 2761 |                 |                     | <b>0·241</b>        |                                   |      |                 |              |
|            | 36-47         | 5;1-6;2                           | 2700 |                 |                     | <b>0·391</b>        |                                   |      |                 |              |
| Colombia 1 | 10-26         | 4;6-5;8                           | 608  |                 |                     | <b>0·368</b>        |                                   |      |                 |              |
|            | 28-45         | 4;6-5;8                           | 561  |                 |                     | <b>0·521</b>        |                                   |      |                 |              |
| Colombia 2 | 6-17          | 6;0-6;11                          | 280  | 0·126           |                     | 0·008               |                                   |      |                 |              |
|            | 18-29         | 6;10-7;11                         | 336  | <b>0·424</b>    |                     | <b>0·357</b>        |                                   |      |                 |              |
|            | 30-42         | 7;10-8;11                         | 324  | <b>0·437</b>    |                     | <b>0·391</b>        |                                   |      |                 |              |
| Ecuador    | 0-11          | 5;7-6;7                           | 158  |                 |                     | 0·069               | 9;2-10;2                          | 166  |                 | 0·070        |
|            | 12-23         | 6;8-7;8                           | 240  |                 |                     | 0·029               | 10;2-11;3                         | 246  |                 | 0·122        |
|            | 24-35         | 7;7-8;8                           | 230  |                 |                     | 0·131               | 11;1-12;2                         | 233  |                 | <b>0·226</b> |

| DAZ                       | Time 1        | Time 2: Middle Childhood          |      |                 |                     | Time 2: Adolescence |                                   |     |                 |              |
|---------------------------|---------------|-----------------------------------|------|-----------------|---------------------|---------------------|-----------------------------------|-----|-----------------|--------------|
|                           | Ages (months) | Ages (years; months) <sup>d</sup> | N    | IQ <sup>a</sup> | Ravens <sup>c</sup> | PPVT                | Ages (years; months) <sup>d</sup> | N   | IQ <sup>b</sup> | PPVT         |
| Ethiopia <sup>c</sup>     | 11-12         |                                   |      |                 |                     |                     | 9;10-10;10                        | 150 |                 | 0·113        |
|                           | 29-32         |                                   |      |                 |                     |                     | 9;10-10;10                        | 369 |                 | <b>0·159</b> |
|                           | 41-44         |                                   |      |                 |                     |                     | 9;10-10;10                        | 391 |                 | <b>0·163</b> |
| Jamaica 1                 | 15            | 6;6-7;1                           | 187  | <b>0·401</b>    |                     |                     |                                   |     |                 |              |
|                           | 24            | 6;6-7;1                           | 188  | <b>0·542</b>    |                     |                     |                                   |     |                 | <b>0·533</b> |
| Jamaica 2                 | 9-25          | 7;0-8;3                           | 154  | <b>0·372</b>    | <b>0·240</b>        | <b>0·389</b>        | 16;9-18;0                         | 126 | <b>0·363</b>    |              |
|                           | 21-37         | 7;0-8;3                           | 154  | <b>0·506</b>    | <b>0·287</b>        | <b>0·537</b>        | 16;9-18;0                         | 126 | <b>0·562</b>    |              |
|                           | 33-48         | 7;0-8;3                           | 135  | <b>0·501</b>    | <b>0·455</b>        | <b>0·476</b>        | 16;9-18;0                         | 109 | <b>0·543</b>    |              |
| Madagascar                | 34-42         | 6;10-7;10                         | 174  | 0·172           |                     | 0·165               |                                   |     |                 |              |
| Netherlands 1             | 0-11          | 4;7-6;1                           | 2662 | <b>0·074</b>    |                     |                     |                                   |     |                 |              |
|                           | 12-23         | 4;7-6;1                           | 1366 | <b>0·149</b>    |                     |                     |                                   |     |                 |              |
|                           | 24-32         | 4;7-6;1                           | 396  | <b>0·287</b>    |                     |                     |                                   |     |                 |              |
| South Africa <sup>f</sup> | 6             | 4;10-5;6<br>& 7;0-8;6             | 196  | 0·183           | 0·052               |                     |                                   |     |                 |              |
|                           | 12            | 4;10-5;6<br>& 7;0-8;6             | 155  | 0·115           | 0·059               |                     |                                   |     |                 |              |
|                           | 24            | 4;10-5;6<br>& 7;0-8;6             | 935  | <b>0·104</b>    | 0·053               |                     |                                   |     |                 |              |

Differences significant <0·05 are in bold

<sup>a</sup>IQ measures at Time 2: middle childhood are WPPSI (Bangladesh, Chile 1, Jamaica 1), WISC-V (Colombia 2), SB-4 (Jamaica 2), SB-5 (Madagascar), UKKI (Netherlands 1) and Denver-II (South Africa)

<sup>b</sup>IQ measures at Time 2: adolescence are WAIS (Brazil 1, Jamaica 2)

<sup>c</sup>Raven's are the Raven's Progressive Matrices (Jamaica 2) and Raven's Coloured Progressive Matrices (South Africa)

<sup>e</sup>The PPVT in Ethiopia was a combined measure of versions 3 and 4

<sup>f</sup>South Africa had follow-up measures at 5 years (Denver-II) and 7 years (Raven's) at Time 2

**Table A3b:** Original\* age-standardized measures in children under 48 months correlated with IQ in Middle Childhood (>4 to 9 years) and Adolescence (>9 to 18 years)

| DAZ                    | Time 1        | Time 2: Middle Childhood          |      |                 |                     | Time 2: Adolescence |                                   |      |                 |              |
|------------------------|---------------|-----------------------------------|------|-----------------|---------------------|---------------------|-----------------------------------|------|-----------------|--------------|
|                        | Ages (months) | Ages (years; months) <sup>d</sup> | N    | IQ <sup>a</sup> | Ravens <sup>c</sup> | PPVT                | Ages (years; months) <sup>d</sup> | N    | IQ <sup>b</sup> | PPVT         |
| Bangladesh             | 18            | 5;3-5;8                           | 1599 | <b>0.347</b>    |                     |                     |                                   |      |                 |              |
| Brazil 1               | 5-11          |                                   |      |                 |                     |                     | 18;6                              | 1151 | <b>0.224</b>    |              |
|                        | 11-19         |                                   |      |                 |                     |                     | 18;6                              | 1117 | <b>0.189</b>    |              |
| Chile 1                | 6             | 5;6-5;8                           | 71   | <b>0.379</b>    |                     |                     |                                   |      |                 |              |
|                        | 12            | 5;6-5;8                           | 834  | <b>0.214</b>    |                     |                     |                                   |      |                 |              |
|                        | 18            | 5;6-5;8                           | 196  | <b>0.252</b>    |                     |                     |                                   |      |                 |              |
| Chile 2                | 24-35         | 4;1-5;2                           | 2761 |                 |                     | <b>0.266</b>        |                                   |      |                 |              |
|                        | 36-47         | 5;1-6;2                           | 2700 |                 |                     | <b>0.407</b>        |                                   |      |                 |              |
| Colombia 1             | 10-26         | 4;6-5;8                           | 608  |                 |                     | <b>0.249</b>        |                                   |      |                 |              |
|                        | 28-45         | 4;6-5;8                           | 561  |                 |                     | <b>0.447</b>        |                                   |      |                 |              |
| Colombia 2             | 6-17          | 6;0-6;11                          | 280  | 0.137           |                     | 0.119               |                                   |      |                 |              |
|                        | 18-29         | 6;10-7;11                         | 336  | <b>0.394</b>    |                     | <b>0.305</b>        |                                   |      |                 |              |
|                        | 30-42         | 7;10-8;11                         | 324  | <b>0.469</b>    |                     | <b>0.344</b>        |                                   |      |                 |              |
| Ecuador                | 0-11          | 5;7-6;7                           | 158  |                 |                     | 0.121               | 9;2-10;2                          | 166  |                 | 0.051        |
|                        | 12-23         | 6;8-7;8                           | 240  |                 |                     | 0.046               | 10;2-11;3                         | 246  |                 | 0.145        |
|                        | 24-35         | 7;7-8;8                           | 230  |                 |                     | 0.072               | 11;1-12;2                         | 233  |                 | <b>0.204</b> |
| Ethiopia <sup>d*</sup> | 11-12         |                                   |      |                 |                     |                     | 9;10-10;10                        | 150  |                 | 0.038        |
|                        | 29-32         |                                   |      |                 |                     |                     | 9;10-10;10                        | 369  |                 | <b>0.196</b> |
|                        | 41-44         |                                   |      |                 |                     |                     | 9;10-10;10                        | 391  |                 | <b>0.162</b> |
| Jamaica 1              | 15            | 6;6-7;1                           | 187  | <b>0.401</b>    |                     | <b>0.313</b>        |                                   |      |                 |              |
|                        | 24            | 6;6-7;1                           | 188  | <b>0.498</b>    |                     | <b>0.439</b>        |                                   |      |                 |              |
| Jamaica 2              | 9-25          | 7;0-8;3                           | 154  | <b>0.328</b>    | 0.033               | 0.138               | 16;9-18;0                         | 126  | 0.211           |              |
|                        | 21-37         | 7;0-8;3                           | 154  | <b>0.525</b>    | <b>0.289</b>        | <b>0.535</b>        | 16;9-18;0                         | 126  | <b>0.543</b>    |              |
|                        | 33-48         | 7;0-8;3                           | 135  | <b>0.571</b>    | <b>0.443</b>        | <b>0.535</b>        | 16;9-18;0                         | 109  | <b>0.593</b>    |              |

| DAZ                       | Time 1        | Time 2: Middle Childhood          |      |                 |                     | Time 2: Adolescence |                                   |   |                 |      |
|---------------------------|---------------|-----------------------------------|------|-----------------|---------------------|---------------------|-----------------------------------|---|-----------------|------|
|                           | Ages (months) | Ages (years; months) <sup>d</sup> | N    | IQ <sup>a</sup> | Ravens <sup>c</sup> | PPVT                | Ages (years; months) <sup>d</sup> | N | IQ <sup>b</sup> | PPVT |
| Madagascar                | 34-42         | 6;10-7;10                         | 174  | 0.218           |                     | 0.165               |                                   |   |                 |      |
| Netherlands 1             | 0-11          | 4;7-6;1                           | 2655 | <b>0.076</b>    |                     |                     |                                   |   |                 |      |
|                           | 12-23         | 4;7-6;1                           | 1361 | <b>0.166</b>    |                     |                     |                                   |   |                 |      |
|                           | 24-32         | 4;7-6;1                           | 394  | <b>0.289</b>    |                     |                     |                                   |   |                 |      |
| South Africa <sup>e</sup> | 6             | 4;10-5;6<br>& 7;0-8;6             | 196  | 0.122           | -0.041              |                     |                                   |   |                 |      |
|                           | 12            | 4;10-5;6<br>& 7;0-8;6             | 155  | 0.168           | 0.077               |                     |                                   |   |                 |      |
|                           | 24            | 4;10-5;6<br>& 7;0-8;6             | 935  | 0.142           | 0.051               |                     |                                   |   |                 |      |

Differences significant <0.05 are in bold

\*For the original instruments, Bayley-I and Bayley-II, we used the MDI in the correlations (Bangladesh, Chile 1, South Africa); for Bayley III, we used the measure from the cognition domain (Colombia 1, Colombia 2, Ethiopia).

<sup>a</sup>IQ Measures at Time 2: middle childhood are WPPSI (Bangladesh, Chile 1, Jamaica 1), WISC-V (Colombia 2), SB-4 (Jamaica 2), SB-5 (Madagascar), UKKI (Netherlands 1) and Denver-II (South Africa)

<sup>b</sup>IQ measures at Time 2: adolescence are WAIS (Brazil 1, Jamaica 2)

<sup>c</sup>Ravens are the Ravens Progressive Matrices<sup>13</sup> (Jamaica 2) and Ravens Coloured Progressive Matrices<sup>14</sup> (South Africa)

<sup>d</sup>Age in years rounded to nearest half year

<sup>e</sup>The PPVT in Ethiopia was a combined measure of versions 3 and 4

<sup>f</sup>South Africa had follow-up measures at 5 years (Denver-II) and 7 years (Ravens) at Time 2
